# Supplementary material for: Contribution of nucleosome binding preferences and co-occurring DNA sequences to transcription factor binding
Source: PubMed Central journal article supplement (PMC3700821; doi:10.1186/1471-2164-14-428), 2013-06-28
Supplement: 1471-2164-14-428-S1.pdf [file 1471-2164-14-428-S1.pdf]

## Supplementary Figures:

**Figure S1. Enrichment of 8-mers in GR, c-Jun and Hoxa2 ChIP-seq Peaks.** (A) Enrichment of GR-like split 8-mers (N-NNN---NNN-N) and their occurrences in the GR ChIP-seq peaks. (B) Enrichment of AP-1-like 8-mers (NNNNNNNN) and their occurrences in the c-Jun ChIP-seq peaks. (C) Enrichment of 8-mers (NNNNNNNN) and their occurrences in the Hoxa2 ChIP-seq peaks.

**Figure S2. Average intrinsic nucleosome occupancy score for canonical motifs.** (A) Average INOS by Tillo's model [1-2] near ( $\pm 750$ -bps) canonical GR motifs (G-ACA---TGT-C): GR ChIP-seq peaks contain 523 canonical motifs in pre-programmed DHS, 665 in re-programmed DHS, 205 without DHS, and unbound GR motifs. Fraction of peaks containing the canonical motif is shown in percent. (B) Average INOS by Tillo's model near ( $\pm 750$ -bps) canonical AP-1 motifs (TGA<sup>C</sup>/<sub>G</sub>TCA): c-Jun ChIP-seq peaks contain 10,673 canonical motifs in pre-programmed DHS, 96 in re-programmed DHS, and 495 without DHS. The average INOS for 260,047 unbound AP-1 motifs is shown. 100,000 randomly selected sequences are shown. Fraction of peaks containing the canonical motif is shown as a percent (%). (C) Average intrinsic nucleosome occupancy probability by Segal's model [3] near ( $\pm 750$ -bps) canonical GR motifs. (D) Average intrinsic nucleosome occupancy probability by Segal's model near ( $\pm 750$ -bps) canonical AP-1 motifs. (E) Average INOS near ( $\pm 750$ -bps) canonical GR motifs (G-ACA--TGT-C) with INOS from -2 to -1; 38 bound and 1,786 unbound GR motifs are shown.

**Figure S3.** (A) Average INOS near ( $\pm 750$ -bps) the center of c-Jun ChIP-seq peaks with and without AP-1 motif (TGA<sup>C</sup>/<sub>G</sub>TCA). (B) Average INOS near ( $\pm 750$ -bps) the center of GR ChIP-seq peaks with and without GR motifs (G-ACA---TGT-C). (C) The histogram shows the distribution of INOS for all c-Jun ChIP-seq peaks with (blue)/without (red) AP-1 motif. (D) The histogram shows the distribution of INOS for all c-Jun ChIP-seq peaks with (blue)/without (red) GR motif.

**Figure S4. Chromatin accessibility of GR and AP-1 motifs in 3134 cell line.** (A) Number of sequencing reads within 150-bps for c-Jun ChIP-seq data at each of the AP-1 8-mers motifs (ATGAGTCA) in the genome compared to DHS reads. Motifs are labeled depending on their presence at pre-, re- and unprogrammed DHS. Unbound AP-1 motifs are presented in grey. (B) Number of sequencing reads within 150-bps for GR ChIP-seq at each of the GR motifs in the

genome compared to DHS reads. Sequence reads for GR and c-Jun ChIP-seq are normalized. **(C)** Density of sequenced tags for GR, c-Jun ChIP-seq, and DNase-seq were counted in 3-Kb up and downstream of the bound GR motifs. **(D)** Density of sequenced tags for GR, c-Jun ChIP-seq and DNase-seq were counted in 3-Kb up and downstream of the bound AP-1 motifs (ATGAGTCA). The bin size used is 300-bps with 150-bps sliding window.

**Figure S5. Clusters of GR and AP-1 motifs are better bound.** **(A)** The occurrence of clustered GR canonical motifs (G-ACA---TGT-C) in the genome and percent bound by GR are presented in different genomic scales from 150-bps to 100-Kbps. The black line denotes percent of GR motifs that are bound in GR peaks. **(B)** The occurrence of clustered AP-1 canonical motifs (TGA<sup>C</sup>/<sub>G</sub>TCA) and percent bound by c-Jun are presented in different genomic scales from 150-bps to 20-Kbps.

**Figure S6. Co-occurrence of AP-1 motifs (TGA<sup>C</sup>/<sub>G</sub>TCA) within a nucleosomal distance promotes GR binding.** **(A)** The occurrence of pairs of canonical GR and AP-1 motifs with space less than 150-bps in the GR ChIP-seq peaks. **(B)** GR binds preferentially to the GR motifs with co-occurrence of AP-1 motifs and with higher INOS. The blue solid histogram shows all 1,448 pairs of GR and AP-1 motifs with space less than 150-bps in genome, and the red blank histogram shows the binding ratio in GR peaks (average is 15.3%, black dashed line). **(C-D)** Enrichment of split 8-mers (N-NNN---NNN-N) vs. all continuous 8-mers in the **(C)** c-Jun and **(D)** Hoxa2 ChIP-seq peaks. Red dots represent the canonical GR motif and 1-bp variants, and the mismatched base is labeled in red. Blue dots represent the 8-mers with AP-1 motif.

**Figure S7. The 1-bp variants of canonical GR motif need more co-occurrence of canonical AP-1 motifs to facilitate GR binding.** **(A)** The relative occurrence of the canonical GR motif and 1-bp variants in pre-, re- and un-programmed GR peaks. The relative occurrence of motifs is calculated as the number of motifs bound per 1000 GR peaks. The motifs are ordered by the enrichment in GR peaks. **(B)** Correlation of tag-density of GR peaks and enrichment of the canonical GR motif and the other 12 1-bp variants in pre-programmed GR peaks. **(C-E)** Correlation of tag-density of GR peaks and co-occurrence of AP-1 motifs in **(C)** pre-programmed, **(D)** re-programmed and **(E)** un-programmed GR peaks with the canonical and 1-bp variants of GR motif. For each dot, the horizontal axis of tag-density is the average tag-density of GR peaks with this motif, and the vertical axis indicates the percentage of GR motifs with AP-1

motifs within 150 bps. The 118 canonical motifs and 3 variants (occurrence < 50) with AP-1 motifs nearby in pre-programmed GR peaks are labeled in each panel. **(F)** Enrichment of all GR-like (NN-NNN---NNN-NN) and AP-1-like (NNNNNNNNNN) 10-mers in the GR ChIP-seq peaks. The enrichment of each 10-mer is calculated as the normalized ratio of occurrence in GR peaks ( $\pm 150$  bps from the center of GR peaks) over occurrence in neighbors ( $\pm 750$  to  $\pm 150$  from center of GR peaks). As expected, [G/A]G-ACA---TGT-C[C/T] and AG-ACA---CGT-C[C/T] are enriched, as high as nearly 40. A new pattern of AC-TAG---TGG-AC [gACtTAGggc] also shows a high enrichment.

**Figure S8. Effect of A-FOS on GR binding to the canonical GR motif and 1-bp variants depends on the presence of an AP-1 motif within 150-bps.** **(A-C)** Percent of GR motifs with (blue) /without (Red) an nearby AP-1 motif that loses GR binding after inhibition of c-Jun binding by expressing the dominant negative A-FOS ) in **(A)** pre-programmed, **(B)** re-programmed and **(C)** un-programmed GR peaks.

## References:

1. Tillo D, Hughes TR: **G+C content dominates intrinsic nucleosome occupancy.** *BMC Bioinformatics* 2009, **10**:442.
2. Tillo D, Kaplan N, Moore IK, Fondufe-Mittendorf Y, Gossett AJ, Field Y, Lieb JD, Widom J, Segal E, Hughes TR: **High nucleosome occupancy is encoded at human regulatory sequences.** *PLoS One*, **5**:e9129.
3. Kaplan N, Moore IK, Fondufe-Mittendorf Y, Gossett AJ, Tillo D, Field Y, LeProust EM, Hughes TR, Lieb JD, Widom J, Segal E: **The DNA-encoded nucleosome organization of a eukaryotic genome.** *Nature* 2009, **458**:362-366.



Figure S2. Nucleosome occupancy at regulatory sites

**Tillo's Model**

**Segal's Model**

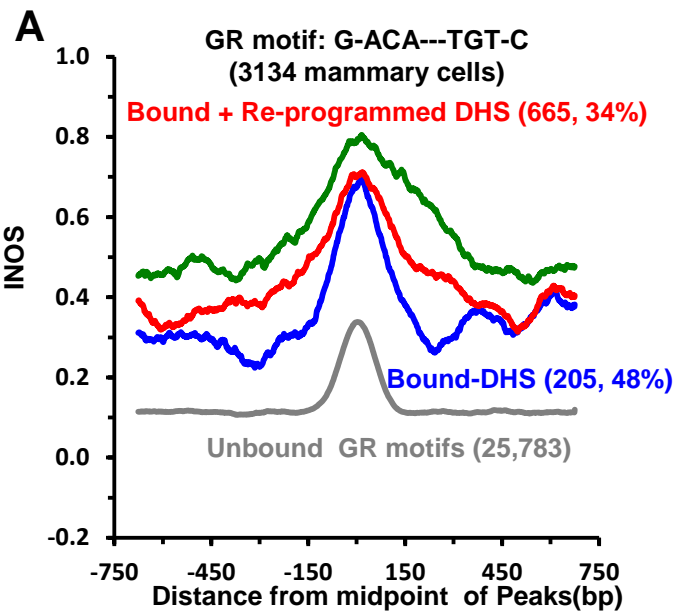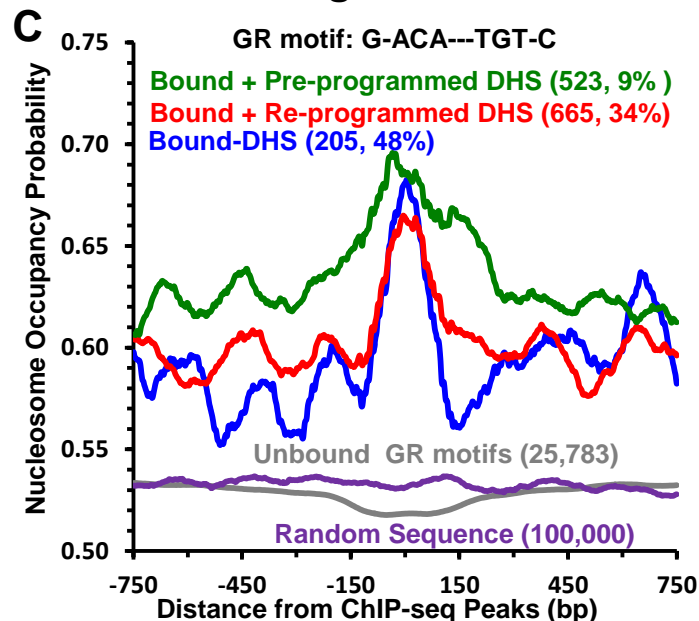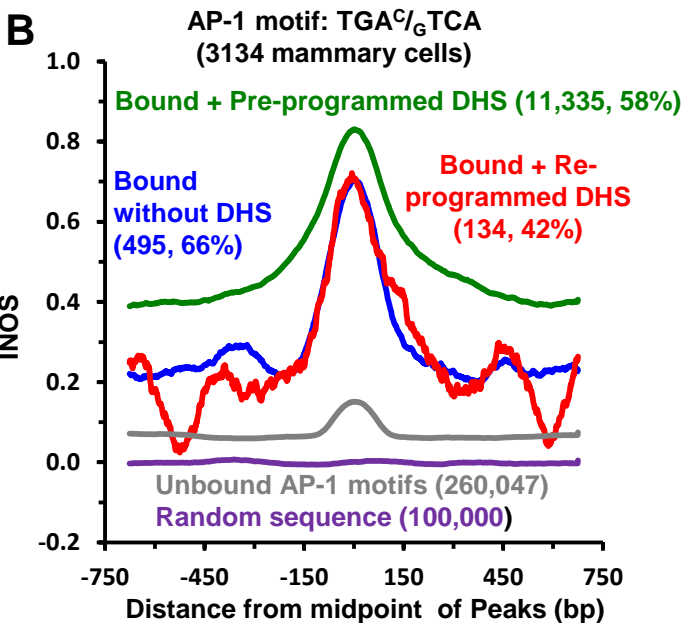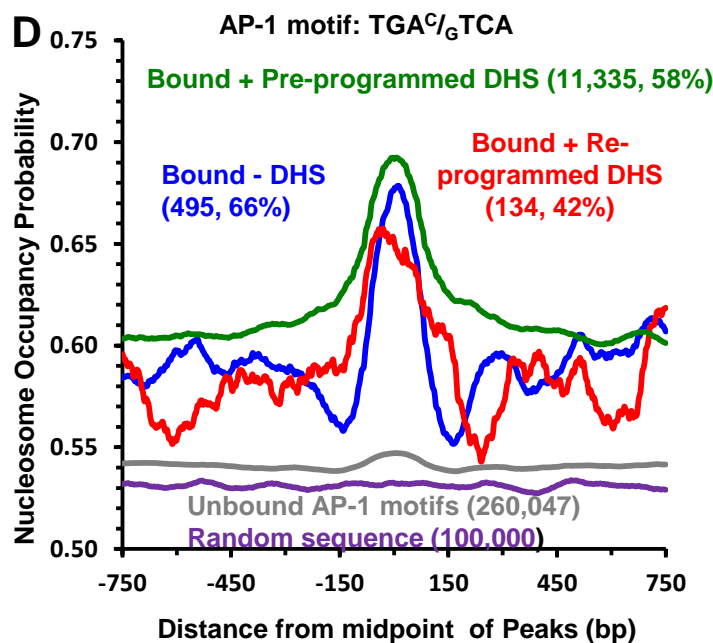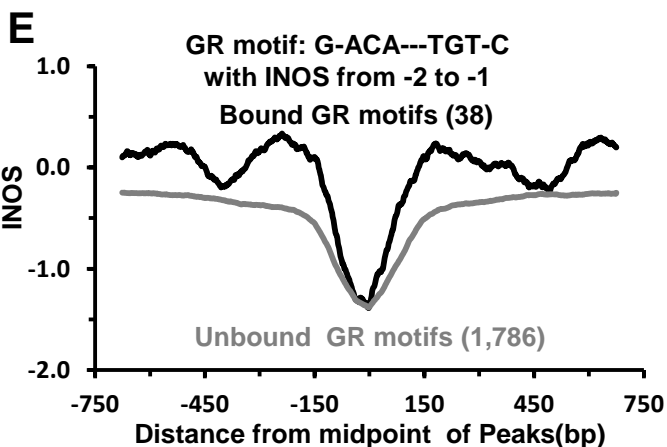

# Figure S3. Nucleosome occupancy at regulatory sites

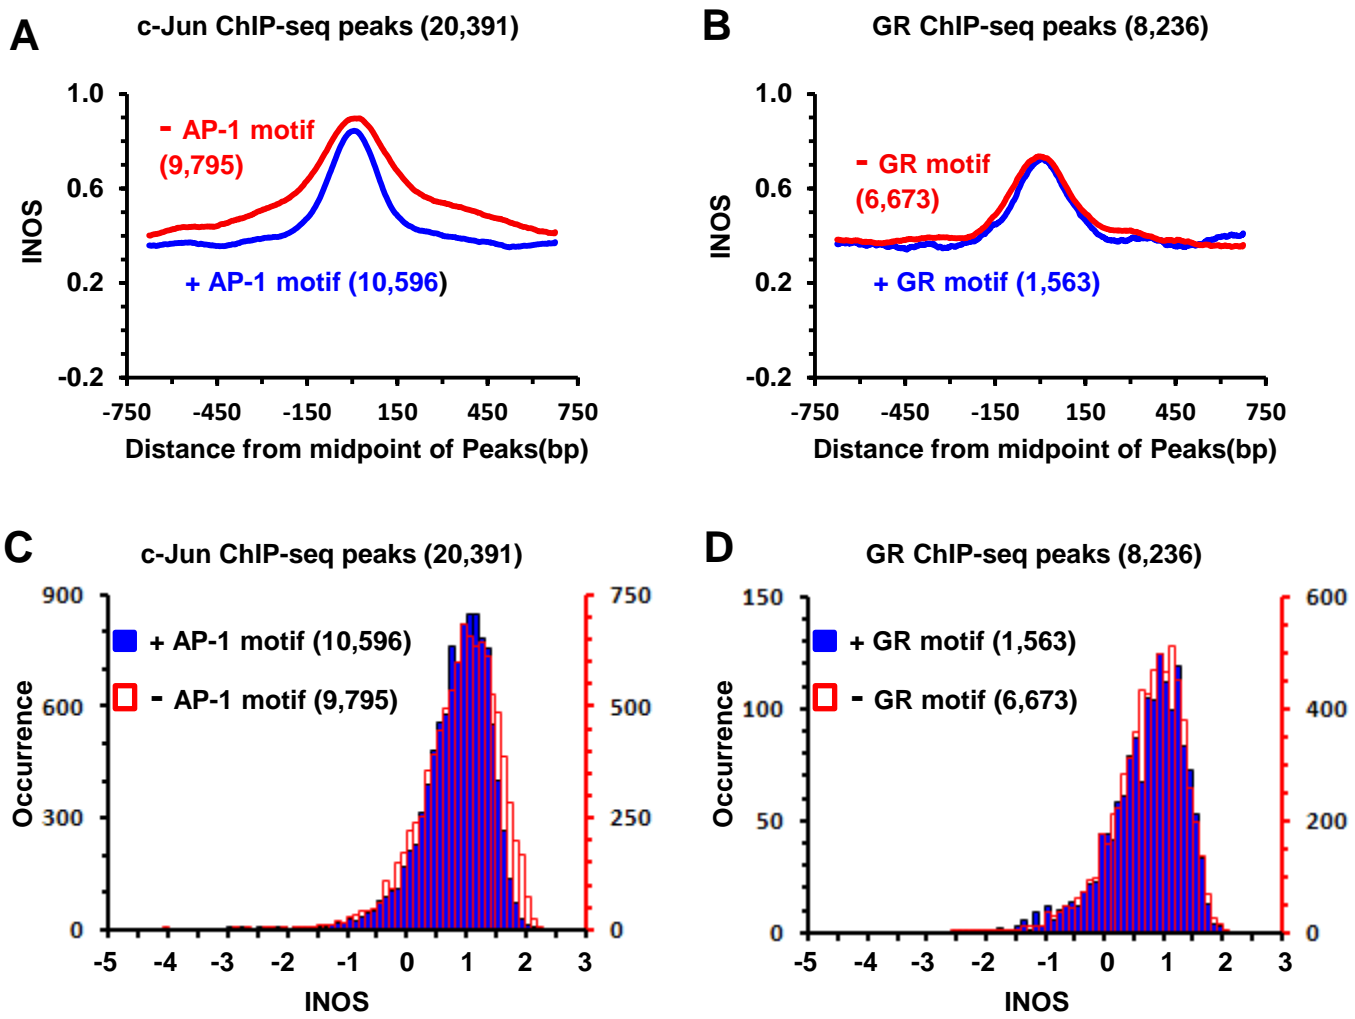

**Figure S4. Chromatin accessibility of GR and AP-1 canonical motifs *in vivo***

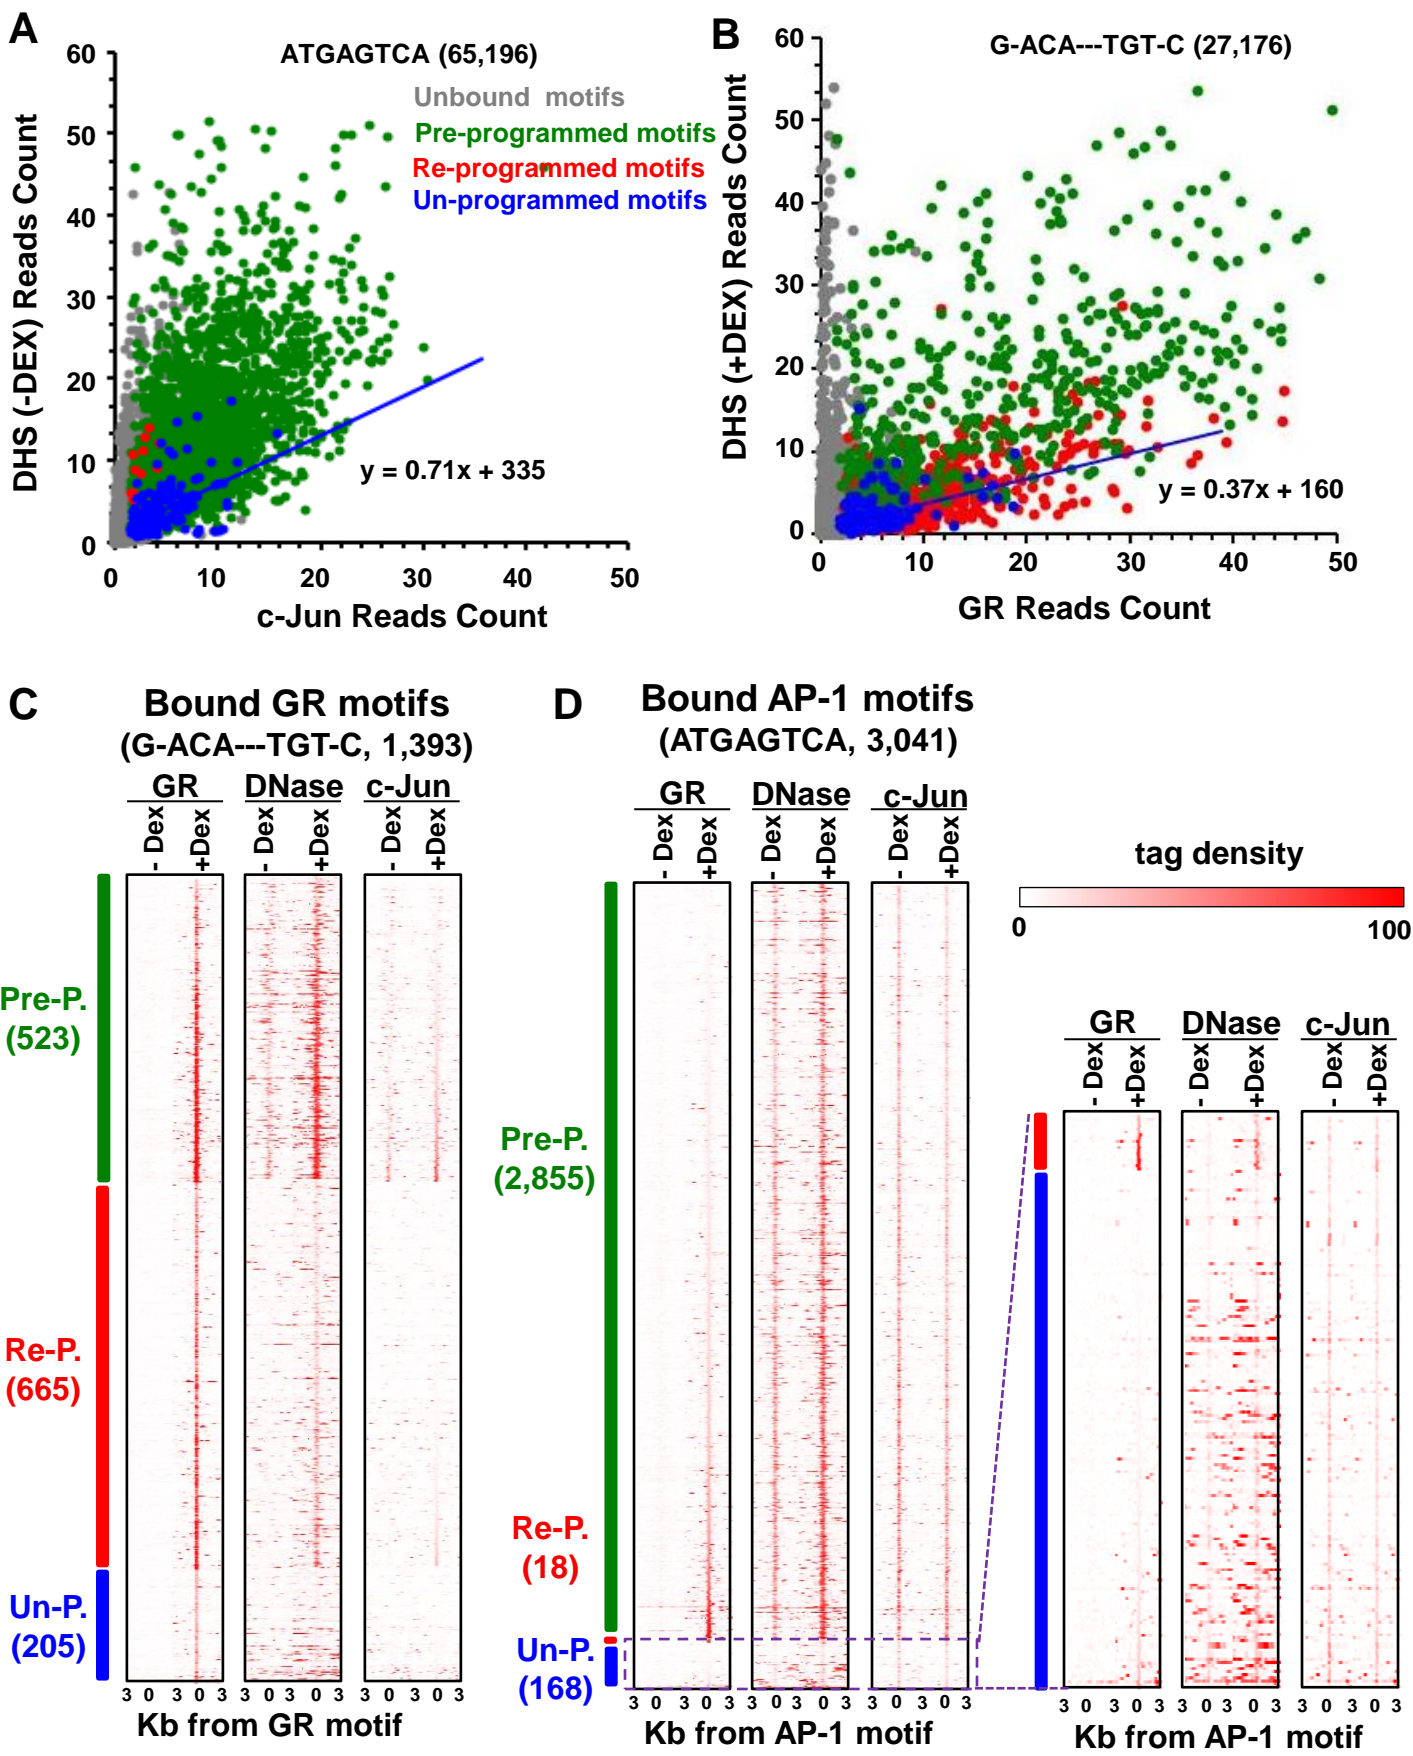

**Figure S5. Clusters of GR and AP-1 motifs are better bound**

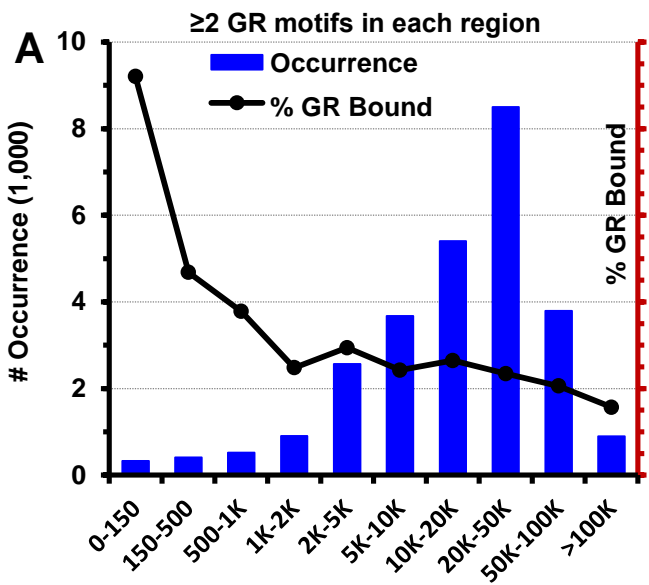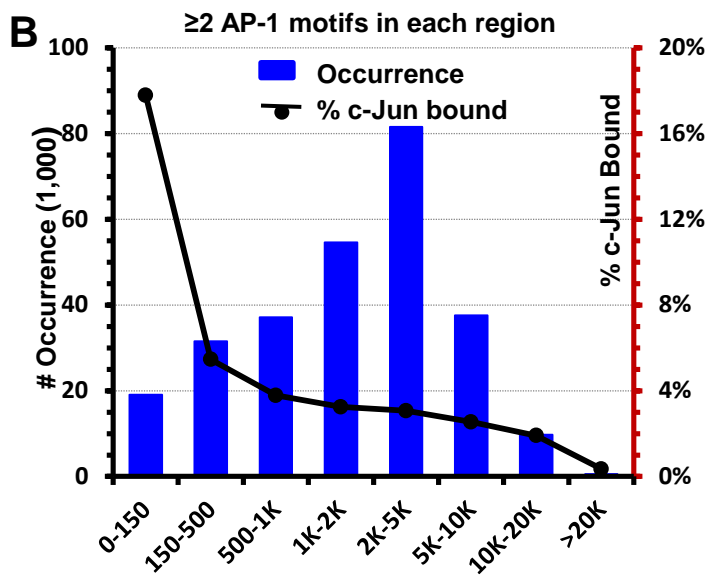



# Figure S6. Co-occurrence of AP-1 motifs (TGA<sup>C</sup>/<sub>G</sub>TCA) within a nucleosome range promotes GR binding

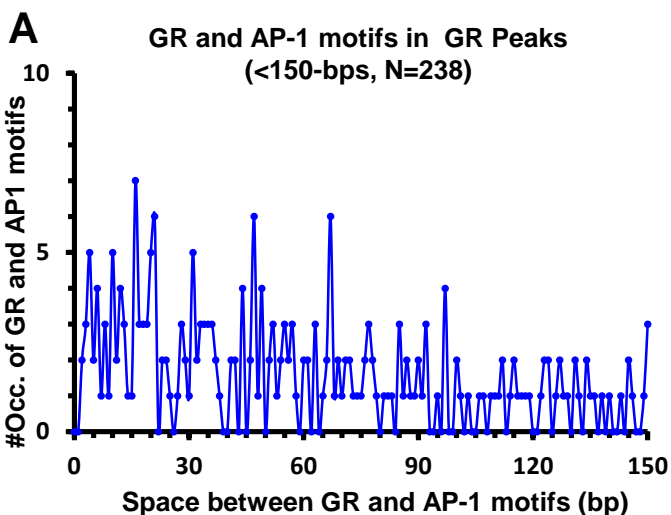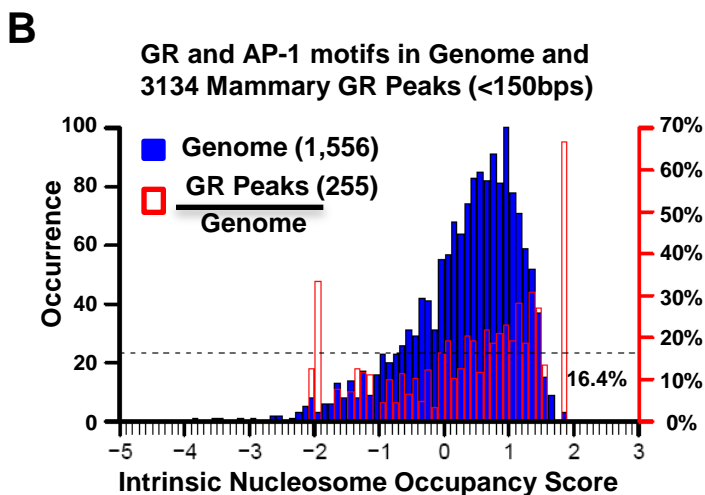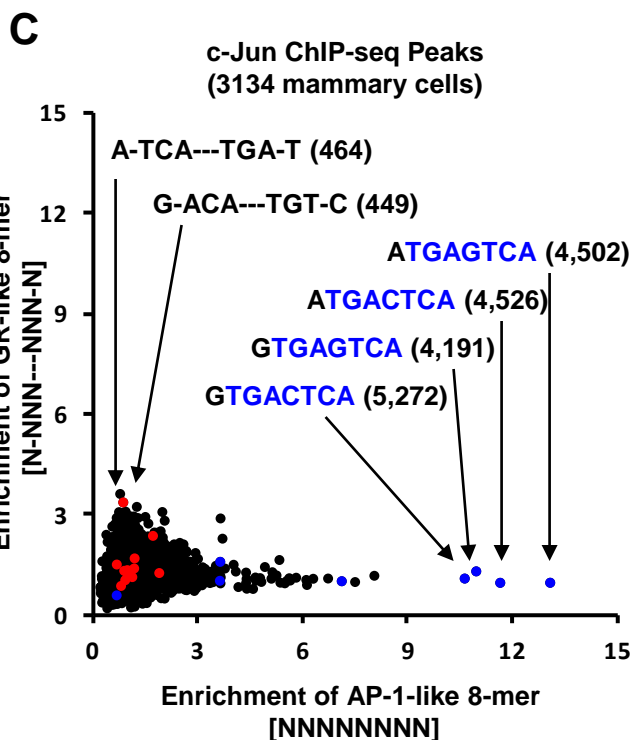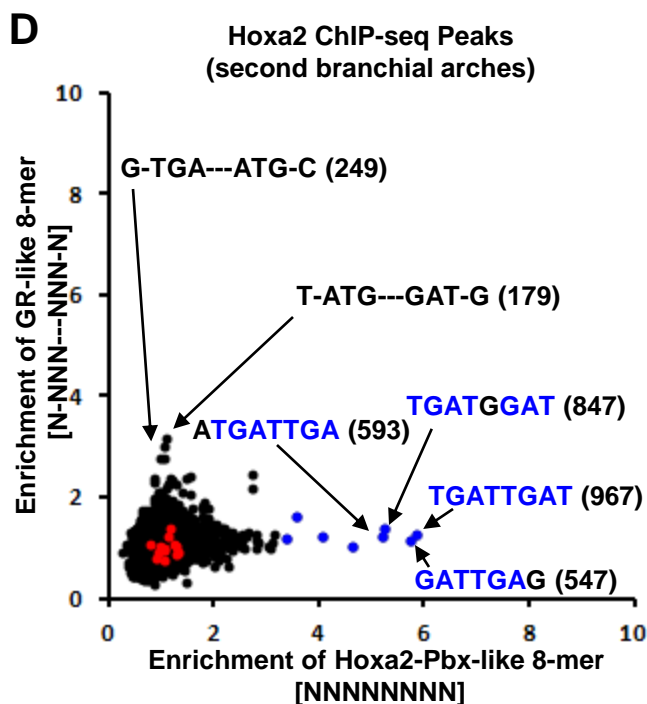

**Figure S7. The 1-bp variants of GR motifs need more co-occurrence of AP-1 motifs to facilitate GR binding.**

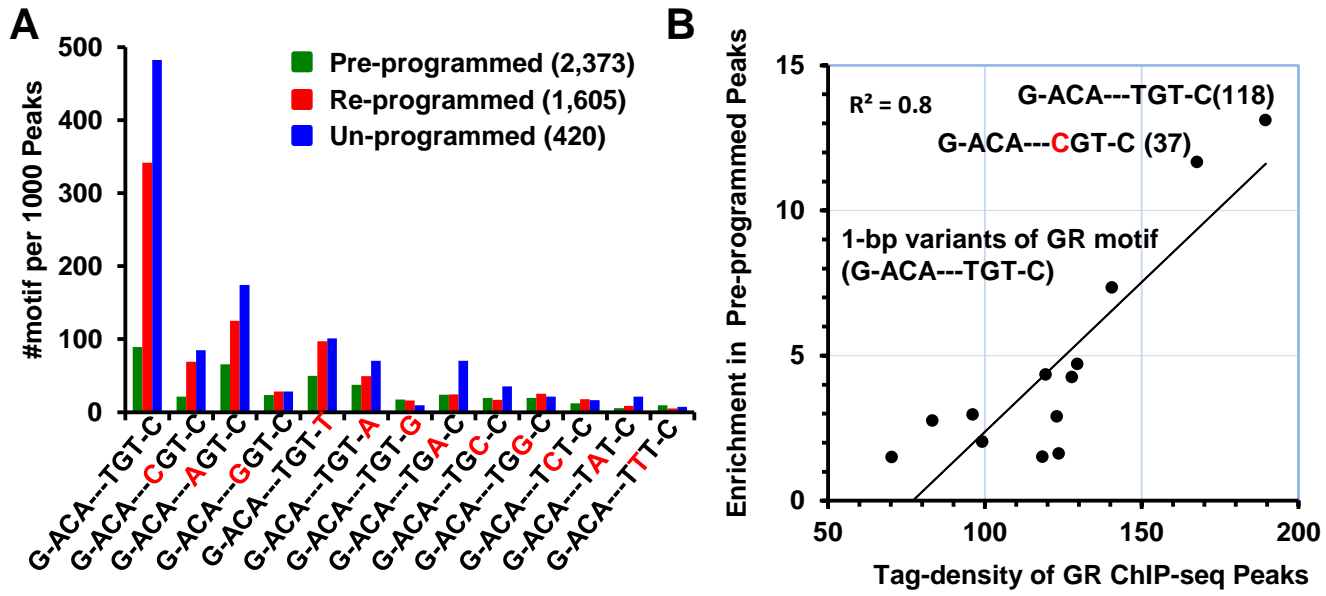

**Figure S8. Effect of A-FOS on GR binding to the GR motif and 1-bp variants depends on the presence of an AP-1 motif within 150-bps.**

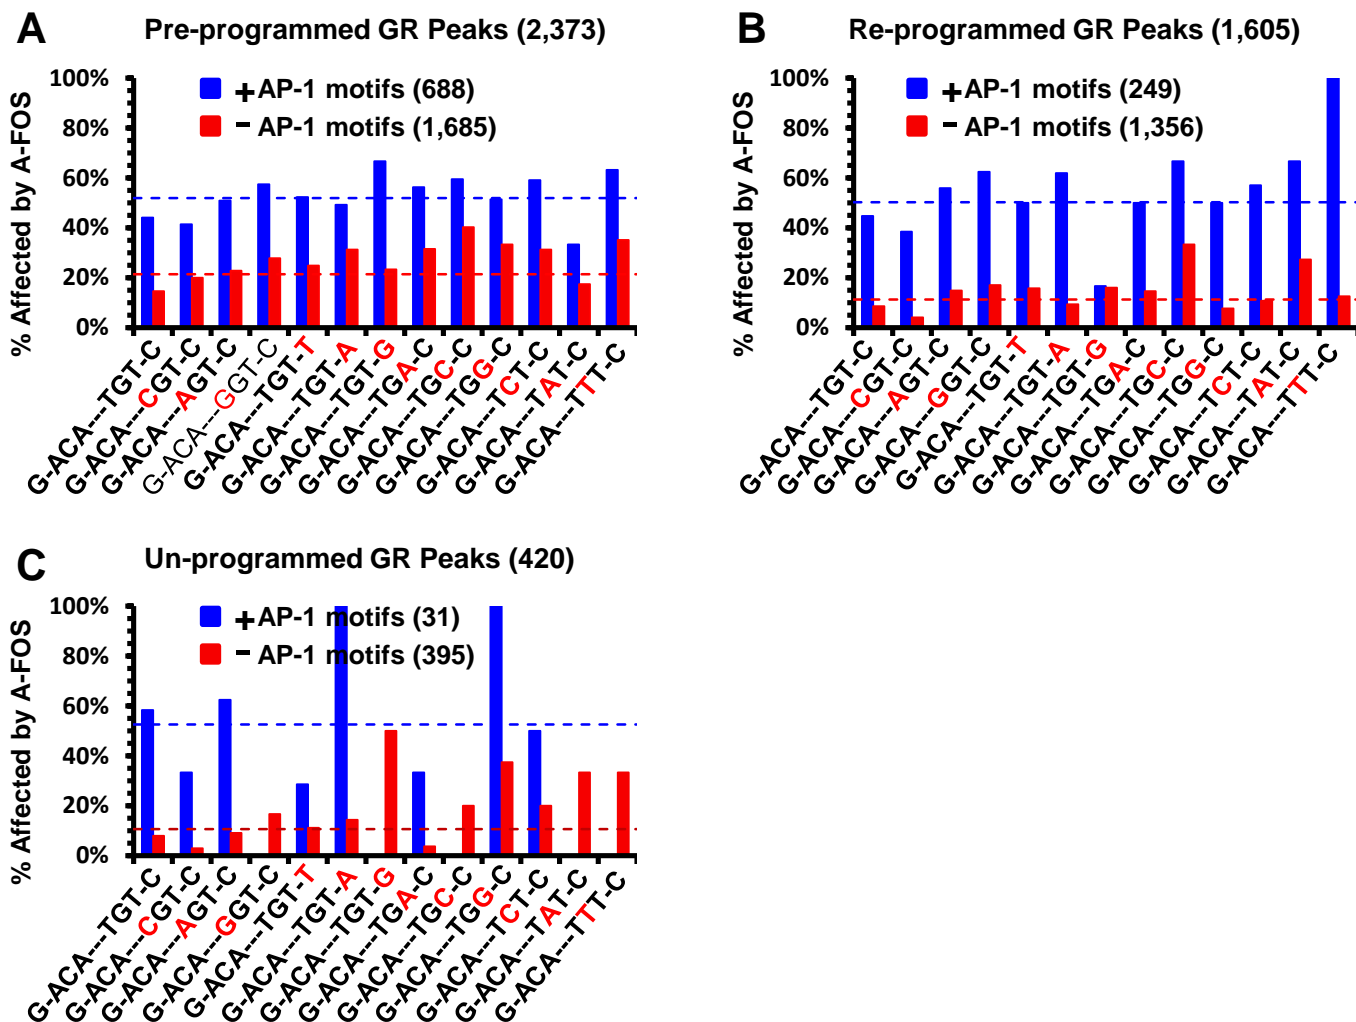

**Supplementary Table 1A.** Modeling the c-Jun binding of consensus AP-1 motif (TGACTCA|ATGAGTCA) using generalized linear models (GLM)

| Evaluated parameters             | ATGAGTCA    |             |             |             |             |             | TGAGTCA     |             |             |            |             |             |
|----------------------------------|-------------|-------------|-------------|-------------|-------------|-------------|-------------|-------------|-------------|------------|-------------|-------------|
|                                  | PVE(%)      |             | CV.err      |             | AUC         |             | PVE(%)      |             | CV.err      |            | AUC         |             |
|                                  | +Motif      |             |             | -Motif      |             |             | +Motif      |             |             | -Motif     |             |             |
| A1. Peak                         | 10.4        | 0.05        | 0.76        | 9.9         | 0.05        | 0.75        | 10.3        | 0.04        | 0.76        | 7.4        | 0.04        | 0.72        |
| A2. Background                   | 5.6         | 0.05        | 0.69        | 5.6         | 0.05        | 0.69        | 6.5         | 0.04        | 0.70        | 6.5        | 0.04        | 0.70        |
| A3. Relative peak                | 2.5         | 0.05        | 0.63        | 2.3         | 0.05        | 0.63        | 1.9         | 0.04        | 0.62        | 1.6        | 0.04        | 0.61        |
| A. INOS (A1+A2+A3)               | <b>11.3</b> | <b>0.05</b> | <b>0.77</b> | <b>10.9</b> | <b>0.05</b> | <b>0.76</b> | <b>11.5</b> | <b>0.04</b> | <b>0.77</b> | <b>8.2</b> | <b>0.04</b> | <b>0.73</b> |
| B. Overlap with CGIs             | 0.8         | 0.05        | 0.53        | 0.8         | 0.05        | 0.53        | 0.9         | 0.04        | 0.53        | 0.9        | 0.04        | 0.53        |
| C. Cluster of AP-1 motifs        | 0.8         | 0.05        | 0.53        | -           | -           | -           | 5.5         | 0.04        | 0.66        | -          | -           | -           |
| D. Co-occurrence of GR motifs    | <b>0.1</b>  | <b>0.05</b> | <b>0.51</b> | <b>0.1</b>  | <b>0.05</b> | <b>0.51</b> | <b>0.2</b>  | <b>0.04</b> | <b>0.51</b> | <b>0.2</b> | <b>0.04</b> | <b>0.51</b> |
| E. Chromatin Accessibility (DHS) | 55.1        | 0.05        | 0.94        | 55.1        | 0.05        | 0.94        | 56.5        | 0.04        | 0.93        | 56.5       | 0.04        | 0.93        |
| A+B                              | 11.4        | 0.05        | 0.77        | 11.1        | 0.05        | 0.77        | 12.3        | 0.04        | 0.78        | 8.3        | 0.04        | 0.73        |
| A+B+C                            | 12.2        | 0.05        | 0.78        | 11.9        | 0.05        | 0.77        | 13.9        | 0.04        | 0.79        | 13.5       | 0.04        | 0.78        |
| A+B+C+D                          | 12.3        | 0.05        | 0.78        | 12.0        | 0.05        | 0.77        | 14.0        | 0.04        | 0.79        | 13.6       | 0.04        | 0.78        |
| A+B+C+D+E                        | 56.1        | 0.04        | 0.96        | 56.1        | 0.04        | 0.96        | 59.6        | 0.03        | 0.96        | 59.5       | 0.03        | 0.96        |

PVE: Percent of variance explained (%) = 1-(deviance/null.deviance)

**Supplementary Table 1B.** Modeling the GR binding of consensus GR motifs (G-ACA---TGT-C) in different cell lines using generalized linear models (GLM)

| Evaluated Parameters                               | 3134 (1,393/8,236) |             |             |            |             |             | AtT-20 (390/3,104) |             |             |            |             |             |
|----------------------------------------------------|--------------------|-------------|-------------|------------|-------------|-------------|--------------------|-------------|-------------|------------|-------------|-------------|
|                                                    | PVE(%)             |             | CV.err      |            | AUC         |             | PVE(%)             |             | CV.err      |            | AUC         |             |
|                                                    | +Motif             |             |             | -Motif     |             |             | +Motif             |             |             | -Motif     |             |             |
| A1. Peak                                           | 2.9                | 0.05        | 0.63        | 2.7        | 0.05        | 0.63        | 2.2                | 0.02        | 0.63        | 2.1        | 0.02        | 0.63        |
| A2. Background                                     | 3                  | 0.05        | 0.64        | 3          | 0.05        | 0.64        | 1.6                | 0.02        | 0.62        | 1.6        | 0.02        | 0.62        |
| A3. Relative peak                                  | 0.2                | 0.05        | 0.53        | 0.2        | 0.05        | 0.53        | 0.4                | 0.02        | 0.56        | 0.4        | 0.02        | 0.56        |
| A. INOS (A1+A2+A3)                                 | <b>3.9</b>         | <b>0.05</b> | <b>0.66</b> | <b>3.9</b> | <b>0.05</b> | <b>0.66</b> | <b>2.6</b>         | <b>0.02</b> | <b>0.65</b> | <b>2.6</b> | <b>0.02</b> | <b>0.65</b> |
| B. Overlap with CpG islands (CGIs)                 | 0.1                | 0.05        | 0.51        | 0.1        | 0.05        | 0.51        | 0.2                | 0.02        | 0.52        | 0.2        | 0.02        | 0.52        |
| C. Cluster of GR motifs                            | 0.6                | 0.05        | 0.51        | -          | -           | -           | 0.1                | 0.02        | 0.50        | -          | -           | -           |
| D1. Co-occurrence with canonical AP-1 motifs       | <b>2.6</b>         | <b>0.05</b> | <b>0.57</b> | <b>2.6</b> | <b>0.05</b> | <b>0.57</b> | 0.1                | 0.02        | 0.51        | 0.1        | 0.02        | 0.51        |
| D2. Co-occurrence with ≥2 canonical AP-1 motif     | 0.3                | 0.05        | 0.51        | 0.3        | 0.05        | 0.51        | 0                  | 0.02        | 0.50        | 0          | 0.02        | 0.50        |
| D3. Co-occurrence with 1-bp variants of AP-1 motif | 0.4                | 0.05        | 0.55        | 0.4        | 0.05        | 0.55        | 0                  | 0.02        | 0.50        | 0          | 0.02        | 0.50        |
| D4. Co-occurrence with E-BOX motifs                | 0.2                | 0.05        | 0.50        | 0.2        | 0.05        | 0.50        | <b>1.1</b>         | <b>0.02</b> | <b>0.55</b> | <b>1.1</b> | <b>0.02</b> | <b>0.55</b> |
| E. Chromatin Accessibility (DHS)                   | 39.3               | 0.04        | 0.82        | 39.3       | 0.04        | 0.82        | -                  | -           | -           | -          | -           | -           |
| F. c-Jun Occupancy (in c-Jun Peaks)                | 18.6               | 0.04        | 0.64        | 18.6       | 0.04        | 0.64        | -                  | -           | -           | -          | -           | -           |
| A+B                                                | 3.9                | 0.05        | 0.66        | 3.9        | 0.05        | 0.66        | 2.6                | 0.02        | 0.65        | 2.6        | 0.02        | 0.65        |
| A+B+C                                              | 4.2                | 0.05        | 0.67        | 4.2        | 0.05        | 0.67        | 2.7                | 0.02        | 0.65        | 2.7        | 0.02        | 0.65        |
| A+B+C+D1                                           | 6.7                | 0.05        | 0.70        | 6.7        | 0.05        | 0.70        | 2.7                | 0.02        | 0.65        | 2.7        | 0.02        | 0.65        |
| A+B+C+D1+D2+D3+D4                                  | 7.0                | 0.05        | 0.71        | 7.0        | 0.05        | 0.71        | 3.5                | 0.02        | 0.67        | 3.5        | 0.02        | 0.67        |
| A+B+C+D1+D2+D3+D4+E                                | 42.4               | 0.03        | 0.88        | 42.4       | 0.03        | 0.88        | -                  | -           | -           | -          | -           | -           |
| A+B+C+D1+D2+D3+D4+E+F                              | 43.8               | 0.03        | 0.88        | 43.8       | 0.03        | 0.88        | -                  | -           | -           | -          | -           | -           |

**Supplementary Table 1C.** Modeling the Hoxa2 binding to of consensus Pbx motif (TGATTGAT) using GLM

| Evaluated parameters                              | TGATTGAT (638/59,802) |             |             |
|---------------------------------------------------|-----------------------|-------------|-------------|
|                                                   | PVE (%)               | CV.err      | AUC         |
| A1. Peak                                          | 0.5                   | 0.01        | 0.57        |
| A2. Background                                    | 0.1                   | 0.01        | 0.50        |
| A3. Relative peak                                 | 0.6                   | 0.01        | 0.57        |
| A. INOS (A1+A2+A3)                                | <b>0.6</b>            | <b>0.01</b> | <b>0.57</b> |
| B. Overlap with CGIs                              | 0.0                   | 0.01        | 0.51        |
| C. Cluster of Pbx motifs                          | 0.1                   | 0.01        | 0.51        |
| D. Co-occurrence of GR-like motif (G-TGA---ATG-C) | <b>0.1</b>            | <b>0.01</b> | <b>0.51</b> |
| A+B                                               | 0.6                   | 0.01        | 0.57        |
| A+B+C                                             | 0.7                   | 0.01        | 0.58        |
| A+B+C+D                                           | 0.8                   | 0.01        | 0.58        |

**Supplementary Table 2A.** Comparison of modeling the c-Jun binding to canonical AP-1 motif with 2 selected 1-bp variants using generalized linear models (GLM)

| Evaluated parameters             | TGCGTCA<br>(11,926/271,973) |             |             | TGCGTCA<br>(318/23,163) |             |             | GGACTCA<br>(452/183,687) |             |             |
|----------------------------------|-----------------------------|-------------|-------------|-------------------------|-------------|-------------|--------------------------|-------------|-------------|
|                                  | PVE(%)                      | CV.err      | AUC         | PVE(%)                  | CV.err      | AUC         | PVE(%)                   | CV.err      | AUC         |
|                                  | A1. Peak                    | 10.3        | 0.04        | 0.76                    | 6.0         | 0.01        | 0.72                     | 3.5         | 0.01        |
| A2. Background                   | 6.5                         | 0.04        | 0.70        | 4.5                     | 0.01        | 0.69        | 1.3                      | 0.01        | 0.62        |
| A3. Relative peak                | 1.9                         | 0.04        | 0.62        | 0.6                     | 0.01        | 0.58        | 1.0                      | 0.01        | 0.61        |
| A. INOS (A1+A2+A3)               | <b>11.5</b>                 | <b>0.04</b> | <b>0.77</b> | <b>7.1</b>              | <b>0.01</b> | <b>0.74</b> | <b>3.5</b>               | <b>0.01</b> | <b>0.69</b> |
| B. Overlap with CGIs             | 0.9                         | 0.04        | 0.53        | 6.8                     | 0.01        | 0.68        | 1.2                      | 0.01        | 0.56        |
| C. Cluster of AP-1 motifs        | 5.5                         | 0.04        | 0.66        | 0.1                     | 0.01        | 0.50        | 0.1                      | 0.01        | 0.50        |
| D. Co-occurrence of GR motifs    | <b>0.2</b>                  | <b>0.04</b> | <b>0.51</b> | <b>0.1</b>              | <b>0.01</b> | <b>0.50</b> | <b>0.1</b>               | <b>0.01</b> | <b>0.50</b> |
| E. Chromatin Accessibility (DHS) | 56.5                        | 0.04        | 0.93        | 44.7                    | 0.01        | 0.95        | 41.4                     | 0.01        | 0.95        |
| A+B                              | 12.3                        | 0.04        | 0.78        | 9.8                     | 0.01        | 0.77        | 4.0                      | 0.01        | 0.70        |
| A+B+C                            | 13.9                        | 0.04        | 0.79        | 10.0                    | 0.01        | 0.77        | 4.0                      | 0.01        | 0.70        |
| A+B+C+D                          | 14.0                        | 0.04        | 0.79        | 10.0                    | 0.01        | 0.77        | 4.0                      | 0.01        | 0.70        |
| A+B+C+D+E                        | 59.6                        | 0.04        | 0.96        | 45.1                    | 0.01        | 0.95        | 42.7                     | 0.01        | 0.95        |

**Supplementary Table 2B.** Comparison of modeling the c-Jun binding to canonical AP-1 motif (8-mer) with 3 selected control 8-mers using generalized linear models (GLM)

| Evaluated parameters             | ATGAGTCA<br>(3,041/65,689) |             |             | TAATATCA<br>(33/74,570) |             |             | TGCATCAA<br>(47/47,424) |             |             | AGACCTGC<br>(97/49,012) |             |             |
|----------------------------------|----------------------------|-------------|-------------|-------------------------|-------------|-------------|-------------------------|-------------|-------------|-------------------------|-------------|-------------|
|                                  | PVE(%)                     | CV.err      | AUC         | PVE(%)                  | CV.err      | AUC         | PVE(%)                  | CV.err      | AUC         | PVE(%)                  | CV.err      | AUC         |
|                                  | A1. Peak                   | 10.4        | 0.05        | 0.76                    | 7.4         | 0.01        | 0.82                    | 5.5         | 0.01        | 0.75                    | 3.5         | 0.01        |
| A2. Background                   | 5.6                        | 0.05        | 0.69        | 2.6                     | 0.01        | 0.70        | 4.1                     | 0.01        | 0.72        | 1.9                     | 0.01        | 0.65        |
| A3. Relative peak                | 2.5                        | 0.05        | 0.63        | 2.8                     | 0.01        | 0.71        | 1.0                     | 0.01        | 0.60        | 0.5                     | 0.01        | 0.57        |
| A. INOS (A1+A2+A3)               | <b>11.3</b>                | <b>0.05</b> | <b>0.77</b> | <b>7.6</b>              | <b>0.01</b> | <b>0.83</b> | <b>6.6</b>              | <b>0.01</b> | <b>0.77</b> | <b>3.8</b>              | <b>0.01</b> | <b>0.71</b> |
| B. Overlap with CGIs             | 0.8                        | 0.05        | 0.53        | 0.2                     | 0.01        | 0.51        | 0.4                     | 0.01        | 0.52        | 0.7                     | 0.01        | 0.55        |
| C. Cluster of AP-1 motifs        | 0.8                        | 0.05        | 0.53        | 0.0                     | 0.01        | 0.50        | 0.1                     | 0.01        | 0.51        | 0.0                     | 0.01        | 0.50        |
| D. Co-occurrence of GR motifs    | <b>0.1</b>                 | <b>0.05</b> | <b>0.51</b> | <b>0.1</b>              | <b>0.01</b> | <b>0.51</b> | <b>0.2</b>              | <b>0.01</b> | <b>0.51</b> | <b>0.5</b>              | <b>0.01</b> | <b>0.52</b> |
| E. Chromatin Accessibility (DHS) | 55.1                       | 0.05        | 0.94        | 40.3                    | 0.04        | 0.88        | 44.0                    | 0.01        | 0.94        | 42.9                    | 0.01        | 0.97        |
| A+B                              | 11.4                       | 0.05        | 0.77        | 8.1                     | 0.01        | 0.84        | 7.5                     | 0.01        | 0.78        | 4.0                     | 0.01        | 0.72        |
| A+B+C                            | 12.2                       | 0.05        | 0.78        | 8.1                     | 0.01        | 0.84        | 7.6                     | 0.01        | 0.79        | 4.0                     | 0.01        | 0.72        |
| A+B+C+D                          | 12.3                       | 0.05        | 0.78        | 8.2                     | 0.01        | 0.84        | 7.8                     | 0.01        | 0.79        | 4.5                     | 0.01        | 0.72        |
| A+B+C+D+E                        | 56.1                       | 0.04        | 0.96        | 43.3                    | 0.01        | 0.94        | 47.5                    | 0.01        | 0.96        | 44.5                    | 0.01        | 0.98        |

**Supplementary Table 2C.** Comparison of modeling the GR binding to canonical GR motif with 1-bp variants using generalized linear models (GLM)

| Evaluated parameters             | G-ACA---TGT-C<br>(1,393/27,176) |             |             | G-ACA---CGT-C<br>(277/7,267) |             |             | G-ACA---TCT-C<br>(109/61,528) |             |             |
|----------------------------------|---------------------------------|-------------|-------------|------------------------------|-------------|-------------|-------------------------------|-------------|-------------|
|                                  | PVE(%)                          | CV.err      | AUC         | PVE(%)                       | CV.err      | AUC         | PVE(%)                        | CV.err      | AUC         |
|                                  | A1. Peak                        | 2.9         | 0.05        | 0.63                         | 1.2         | 0.04        | 0.59                          | 1.5         | 0.01        |
| A2. Background                   | 3                               | 0.05        | 0.64        | 1.2                          | 0.04        | 0.59        | 0.4                           | 0.01        | 0.59        |
| A3. Relative peak                | 0.2                             | 0.05        | 0.53        | 0.1                          | 0.04        | 0.52        | 0.7                           | 0.01        | 0.59        |
| A. INOS (A1+A2+A3)               | <b>3.9</b>                      | <b>0.05</b> | <b>0.66</b> | <b>1.7</b>                   | <b>0.04</b> | <b>0.60</b> | <b>1.5</b>                    | <b>0.01</b> | <b>0.65</b> |
| B. Overlap with CGIs             | 0.1                             | 0.05        | 0.51        | 0.1                          | 0.04        | 0.51        | 0.2                           | 0.01        | 0.51        |
| C. Cluster of GR motifs          | 0.6                             | 0.05        | 0.51        | 0.1                          | 0.04        | 0.51        | 0.1                           | 0.01        | 0.50        |
| D. Co-occurrence of AP-1 motifs  | <b>2.6</b>                      | <b>0.05</b> | <b>0.57</b> | <b>1.7</b>                   | <b>0.04</b> | <b>0.57</b> | <b>2.7</b>                    | <b>0.01</b> | <b>0.63</b> |
| E. Chromatin Accessibility (DHS) | 39.3                            | 0.04        | 0.82        | 28.5                         | 0.04        | 0.81        | 35.4                          | 0.01        | 0.90        |
| A+B                              | 3.9                             | 0.05        | 0.66        | 2.2                          | 0.04        | 0.62        | 1.9                           | 0.01        | 0.66        |
| A+B+C                            | 4.2                             | 0.05        | 0.67        | 2.2                          | 0.04        | 0.62        | 1.9                           | 0.01        | 0.66        |
| A+B+C+D                          | 6.7                             | 0.05        | 0.70        | 3.8                          | 0.04        | 0.65        | 4.6                           | 0.01        | 0.72        |
| A+B+C+D+E                        | 42.4                            | 0.03        | 0.88        | 34.9                         | 0.04        | 0.84        | 39.8                          | 0.01        | 0.91        |

**Supplementary Table 3A.** Distribution of Intrinsic Nucleosome Occupancy Scores (INOS) of c-Jun motifs (TGACTCA) on the whole mouse genome

| Relative Peaks | Average of PNPS in Background (-750...-150 AND +150...+750) |               |              |                     |               |              | Total                |
|----------------|-------------------------------------------------------------|---------------|--------------|---------------------|---------------|--------------|----------------------|
|                | [-2,-1)                                                     | [-1,0)        | [0,0.5)      | [0.5,0.8)           | [0.8,1.2)     | [1.2,2)      |                      |
| [2,3)          | 558(3.4%)                                                   | 440(9.5%)     | NA           | NA                  | NA            | NA           | 998(6.1%)            |
| [1.2,2)        | 2,484(1.6%)                                                 | 12,209(5.8%)  | 2,198(11.9%) | 89(18%)             | 3(66.7%)      | NA           | 16,983(6%)           |
| [0.8,1.2)      | 1,846(0.5%)                                                 | 16,923(3.7%)  | 10,427(9%)   | <b>2,184(14.4%)</b> | 378(23.3%)    | 5(60%)       | 31,763(6.2%)         |
| [0.5,0.8)      | 1,374(0.3%)                                                 | 15,197(2.6%)  | 13,839(6.5%) | 5,766(10%)          | 2,596(16.9%)  | 125(27.2%)   | 38,897(6%)           |
| [0,0.5)        | 2,001(0.1%)                                                 | 23,465(1.6%)  | 24,128(4.6%) | 13,010(7.4%)        | 10,464(10.7%) | 1,661(14.4%) | 74,729(5.1%)         |
| [-1,0)         | <b>2,204(0%)</b>                                            | 28,078(0.8%)  | 26,439(2.4%) | 13,490(4.4%)        | 10,207(7.1%)  | 2,213(9.6%)  | 82,631(2.9%)         |
| [-3,-1)        | 497(0%)                                                     | 9,647(0.3%)   | 9,120(1.1%)  | 3,846(2.5%)         | 1,949(3.6%)   | 206(6.8%)    | 25,265(1.2%)         |
| [-5,-3)        | 1(0%)                                                       | 166(0.6%)     | 304(0.7%)    | 147(0.7%)           | 86(8.1%)      | 2(0%)        | 706(1.6%)            |
| <b>Total</b>   | 10,965(0.7%)                                                | 106,125(2.3%) | 86,455(4.6%) | 38,532(6.7%)        | 25,683(9.6%)  | 4,212(11.9%) | <b>271,972(4.4%)</b> |

**Supplementary Table 3B.** Distribution of Intrinsic Nucleosome Occupancy Scores (INOS) of GR-motifs (G-ACA---TGT-C) on the whole mouse genome

| Relative Peaks | Average of PNPS in Background (-750...-150 AND +150...+750) |             |             |                |             |            | Total               |
|----------------|-------------------------------------------------------------|-------------|-------------|----------------|-------------|------------|---------------------|
|                | [-2,-1)                                                     | [-1,0)      | [0,0.5)     | [0.5,0.8)      | [0.8,1.2)   | [1.2,2)    |                     |
| [2,3)          | 80(0%)                                                      | 90(1.1%)    | NA          | NA             | NA          | NA         | 170(0.6%)           |
| [1.2,2)        | 256(2%)                                                     | 1,592(4.9%) | 343(5.8%)   | <b>25(12%)</b> | NA          | NA         | 2,216(4.8%)         |
| [0.8,1.2)      | 161(2.5%)                                                   | 1,722(3.9%) | 1,356(7.4%) | 344(10.8%)     | 68(8.8%)    | 1(0%)      | 3,652(5.9%)         |
| [0.5,0.8)      | 134(2.2%)                                                   | 1,431(3.1%) | 1,567(7.5%) | 833(7.8%)      | 414(8.7%)   | 30(16.7%)  | 4,409(6.1%)         |
| [0,0.5)        | 177(0.6%)                                                   | 2,110(2.3%) | 2,309(5%)   | 1,440(7.6%)    | 1,300(9.7%) | 267(11.6%) | 7,603(5.7%)         |
| [-1,0)         | 143(0%)                                                     | 2,235(1.4%) | 2,356(4.2%) | 1,270(5.7%)    | 965(8.6%)   | 260(8.1%)  | 7,229(4.3%)         |
| [-3,-1)        | <b>25(0%)</b>                                               | 672(1.2%)   | 679(3.2%)   | 299(4.3%)      | 149(10.1%)  | 21(14.3%)  | 1,845(3.3%)         |
| [-5,-3)        | NA                                                          | 13(0%)      | 18(0%)      | 11(0%)         | 5(0%)       | 2(0%)      | 49(0%)              |
| <b>Total</b>   | 976(1.3%)                                                   | 9,865(2.8%) | 8,628(5.5%) | 4,222(7.1%)    | 2,901(9.2%) | 581(10.3%) | <b>27,173(5.1%)</b> |

Supplementary Table 4A. Gene Expression of Near GR ChIP-seq Peaks (&lt;2K)

|                                                     |       | Down-regulation<br>(10% decrease) |       | No-Change |       | Up-regulation<br>(10% Increase) |       | Total |
|-----------------------------------------------------|-------|-----------------------------------|-------|-----------|-------|---------------------------------|-------|-------|
|                                                     |       | #                                 | %     | #         | %     | #                               | %     | #     |
| GR Peaks<br>(1,347, 16.4%)                          | PRE   | 221                               | 21.8% | 566       | 55.7% | 229                             | 22.5% | 1,016 |
|                                                     | REP   | 60                                | 21.1% | 152       | 53.3% | 73                              | 25.6% | 285   |
|                                                     | UNP   | 11                                | 23.9% | 24        | 52.2% | 11                              | 23.9% | 46    |
|                                                     | Total | 292                               | 21.7% | 742       | 55.1% | 313                             | 23.2% | 1,347 |
| GR Peaks with<br>G-ACA---TGT-C<br>(272, 3.3%)       | PRE   | 14                                | 12.0% | 63        | 53.8% | 40                              | 34.2% | 117   |
|                                                     | REP   | 24                                | 18.9% | 73        | 57.5% | 30                              | 23.6% | 127   |
|                                                     | UNP   | 8                                 | 28.6% | 16        | 57.1% | 4                               | 14.3% | 28    |
|                                                     | Total | 46                                | 16.9% | 152       | 55.9% | 74                              | 27.2% | 272   |
| GR Peaks without<br>G-ACA---TGT-C<br>(1,075, 13.1%) | PRE   | 207                               | 23.0% | 503       | 56.0% | 189                             | 21.0% | 899   |
|                                                     | REP   | 36                                | 22.8% | 79        | 50.0% | 43                              | 27.2% | 158   |
|                                                     | UNP   | 3                                 | 16.7% | 8         | 44.4% | 7                               | 38.9% | 18    |
|                                                     | Total | 246                               | 22.9% | 590       | 54.9% | 239                             | 22.2% | 1,075 |

Supplementary Table 4B. Gene Expression of Near GR ChIP-seq Peaks (&lt;5K)

|                                                     |       | Down-regulation<br>(10% decrease) |       | No-Change |       | Up-regulation<br>(10% Increase) |       | Total |
|-----------------------------------------------------|-------|-----------------------------------|-------|-----------|-------|---------------------------------|-------|-------|
|                                                     |       | #                                 | %     | #         | %     | #                               | %     | #     |
| GR Peaks<br>(2,254, 27.4%)                          | PRE   | 374                               | 22.3% | 929       | 55.4% | 373                             | 22.3% | 1,676 |
|                                                     | REP   | 120                               | 24.4% | 258       | 52.4% | 114                             | 23.2% | 492   |
|                                                     | UNP   | 14                                | 16.3% | 51        | 59.3% | 21                              | 24.4% | 86    |
|                                                     | Total | 508                               | 22.5% | 1,238     | 54.9% | 508                             | 22.5% | 2,254 |
| GR Peaks with<br>G-ACA---TGT-C<br>(456, 5.5%)       | PRE   | 28                                | 14.5% | 109       | 56.5% | 56                              | 29.0% | 193   |
|                                                     | REP   | 52                                | 24.1% | 122       | 56.5% | 42                              | 19.4% | 216   |
|                                                     | UNP   | 10                                | 21.3% | 28        | 59.6% | 9                               | 19.1% | 47    |
|                                                     | Total | 90                                | 19.7% | 259       | 56.8% | 107                             | 23.5% | 456   |
| GR Peaks without<br>G-ACA---TGT-C<br>(1,798, 21.8%) | PRE   | 346                               | 23.3% | 820       | 55.3% | 317                             | 21.4% | 1,483 |
|                                                     | REP   | 68                                | 24.6% | 136       | 49.3% | 72                              | 26.1% | 276   |
|                                                     | UNP   | 4                                 | 10.3% | 23        | 59.0% | 12                              | 30.8% | 39    |
|                                                     | Total | 418                               | 23.2% | 979       | 54.4% | 401                             | 22.3% | 1,798 |

Supplementary Table 4C. Gene Expression of Near GR ChIP-seq Peaks (&lt;20K)

|                                                     |       | Down-regulation<br>(10% decrease) |       | No-Change |       | Up-regulation<br>(10% Increase) |       | Total |
|-----------------------------------------------------|-------|-----------------------------------|-------|-----------|-------|---------------------------------|-------|-------|
|                                                     |       | #                                 | %     | #         | %     | #                               | %     | #     |
| GR Peaks<br>(4,226, 51.3%)                          | PRE   | 672                               | 21.8% | 1746      | 56.7% | 662                             | 21.5% | 3,080 |
|                                                     | REP   | 213                               | 22.6% | 522       | 55.3% | 209                             | 22.1% | 944   |
|                                                     | UNP   | 46                                | 22.8% | 119       | 58.9% | 37                              | 18.3% | 202   |
|                                                     | Total | 931                               | 22.0% | 2,387     | 56.5% | 908                             | 21.5% | 4,226 |
| GR Peaks with<br>G-ACA---TGT-C<br>(835, 10.1%)      | PRE   | 48                                | 14.3% | 196       | 58.5% | 91                              | 27.2% | 335   |
|                                                     | REP   | 94                                | 23.7% | 222       | 56.1% | 80                              | 20.2% | 396   |
|                                                     | UNP   | 23                                | 22.1% | 62        | 59.6% | 19                              | 18.3% | 104   |
|                                                     | Total | 165                               | 19.8% | 480       | 57.5% | 190                             | 22.8% | 835   |
| GR Peaks without<br>G-ACA---TGT-C<br>(3,391, 41.2%) | PRE   | 624                               | 22.7% | 1,550     | 56.5% | 571                             | 20.8% | 2,745 |
|                                                     | REP   | 119                               | 21.7% | 300       | 54.7% | 129                             | 23.5% | 548   |
|                                                     | UNP   | 23                                | 23.5% | 57        | 58.2% | 18                              | 18.4% | 98    |
|                                                     | Total | 766                               | 22.6% | 1907      | 56.2% | 718                             | 21.2% | 3,391 |

**Supplementary Table 5A.** GR canonical motif (G-ACA---TGT-C) with/without co-occurrence of AP-1 canonical motif and 1-bp variants in the mouse genome and 3134 GR peaks (<150-bps)

|                    | – AP-1 motif |         |         |         | +1 AP-1 motif |         |         |           | ≥2 AP-1 motifs |         |         |          |
|--------------------|--------------|---------|---------|---------|---------------|---------|---------|-----------|----------------|---------|---------|----------|
|                    | #            | GR peak | % bound | p-value | #             | GR peak | % bound | p-value   | #              | GR peak | % bound | p-value  |
| <b>0 variants</b>  | 10,201       | 364     | 3.6%    | -       | 590           | 90      | 15.3%   | NA        | -              | -       | -       | -        |
| <b>1 variant</b>   | 9,329        | 437     | 4.7%    | 9.9E-05 | 544           | 79      | 14.5%   | 0.79      | -              | -       | -       | -        |
| <b>2 variants</b>  | 4,274        | 217     | 5.1%    | 3.0E-05 | 369           | 71      | 19.2%   | 0.13      | -              | -       | -       | -        |
| <b>3 variants</b>  | 1,343        | 82      | 6.1%    | 8.2E-06 | -             | -       | -       | -         | -              | -       | -       | -        |
| <b>≥4 variants</b> | 473          | 38      | 8.0%    | 1.2E-06 | -             | -       | -       | -         | -              | -       | -       | -        |
| <b>Total</b>       | 25,620       | 1,138   | 4.4%    | -       | 1,503         | 240     | 16.0%   | < 2.2E-16 | 53             | 15      | 28.3%   | 8.52E-16 |

**Supplementary Table 5B.** 1-bp variant of GR canonical motif (G-ACA---AGT-C) with/without co-occurrence of AP-1 canonical motif and 1-bp variants in the mouse genome and 3134 GR peaks (<150-bps)

|                    | – AP-1 motif |         |         |         | +1 AP-1 motif |         |         |           | ≥2 AP-1 motifs |         |         |           |
|--------------------|--------------|---------|---------|---------|---------------|---------|---------|-----------|----------------|---------|---------|-----------|
|                    | #            | GR peak | % bound | p-value | #             | GR peak | % bound | p-value   | #              | GR peak | % bound | p-value   |
| <b>0 variants</b>  | 16,789       | 169     | 1.0%    | -       | 953           | 47      | 4.9%    | -         | -              | -       | -       | -         |
| <b>1 variant</b>   | 15,660       | 225     | 1.4%    | 4.9E-04 | 924           | 61      | 6.6%    | 0.15      | -              | -       | -       | -         |
| <b>2 variants</b>  | 7,492        | 130     | 1.7%    | 2.7E-06 | 652           | 47      | 7.2%    | 0.07      | -              | -       | -       | -         |
| <b>3 variants</b>  | 2,367        | 50      | 2.1%    | 3.6E-06 | -             | -       | -       | -         | -              | -       | -       | -         |
| <b>≥4 variants</b> | 720          | 14      | 1.9%    | 2.5E-02 | -             | -       | -       | -         | -              | -       | -       | -         |
| <b>Total</b>       | 43,028       | 588     | 1.4%    | -       | 2,529         | 155     | 6.1%    | < 2.2E-16 | 84             | 16      | 19.0%   | < 2.2E-16 |

**Supplementary Table 5C.** GR canonical motif (G-ACA---TGT-C) with/without co-occurrence of AP-1 and E-Box canonical motif in the mouse genome and AtT-20 GR peaks (<150-bps)

|                 | Genome | GR peak | %bound | p-value |
|-----------------|--------|---------|--------|---------|
| – AP-1 motif    | 25,620 | 359     | 1.4%   | -       |
| +1 AP-1 motif   | 1,503  | 31      | 2.1%   | 0.05    |
| ≥2 AP-1 motifs  | 53     | 0       | 0.0%   | 0.78    |
| – E-Box motif   | 25,373 | 327     | 1.3%   | -       |
| +1 E-Box motif  | 1,444  | 45      | 3.1%   | 1.5E-08 |
| ≥2 E-Box motifs | 359    | 18      | 5.0%   | 4.6E-09 |
| <b>Total</b>    | 27,176 | 1,393   | 5.1%   | -       |
